# Supplementary material for: Prediagnostic Immune Cell Profiles and Breast Cancer
Source: PubMed Central journal article supplement (PMC6991268; doi:10.1001/jamanetworkopen.2019.19536), 2020-01-17
Supplement: jamanetwopen-3-e1919536-s001.pdf [file jamanetwopen-3-e1919536-s001.pdf]

## Supplementary Online Content

Kresovich JK, O'Brien KM, Xu Z, Weinberg CR, Sandler DP, Taylor JA. Prediagnostic immune cell profiles and breast cancer. *JAMA Netw Open*. 2020;3(1):e1919536. doi:10.1001/jamanetworkopen.2019.19536

**eFigure 1.** Sampling Procedure for the Case-Cohort Subsample

**eFigure 2.** Leukocyte Proportions Correlations With Age

**eFigure 3.** Leukocyte Proportion Estimates Over Time

**eTable 1.** Cox Proportional Hazard Ratios for Leukocyte Subtypes (Comparing Above vs Below the Median Proportion) and Breast Cancer, by Menopause Status at Blood Draw

**eTable 2.** Cox Proportional Hazard Ratios for Leukocyte Subtypes (Comparing Above vs Below the Median Proportion) and Invasive Breast Cancer and DCIS Risk, Overall and Stratified by Menopausal Status at Blood Draw

**eTable 3.** Cox Proportional Hazard Ratios for Leukocyte Subtypes (Comparing High vs Low Proportions) and Invasive Breast Cancer and DCIS Risk, Overall and Stratified by Time Since Blood Draw

**eTable 4.** Mutually Adjusted Cox Proportional Hazard Ratios for Leukocyte Subtypes (Comparing Above vs Below the Median Proportion) and Breast Cancer Risk, by Time Since Blood Draw

This supplementary material has been provided by the authors to give readers additional information about their work.

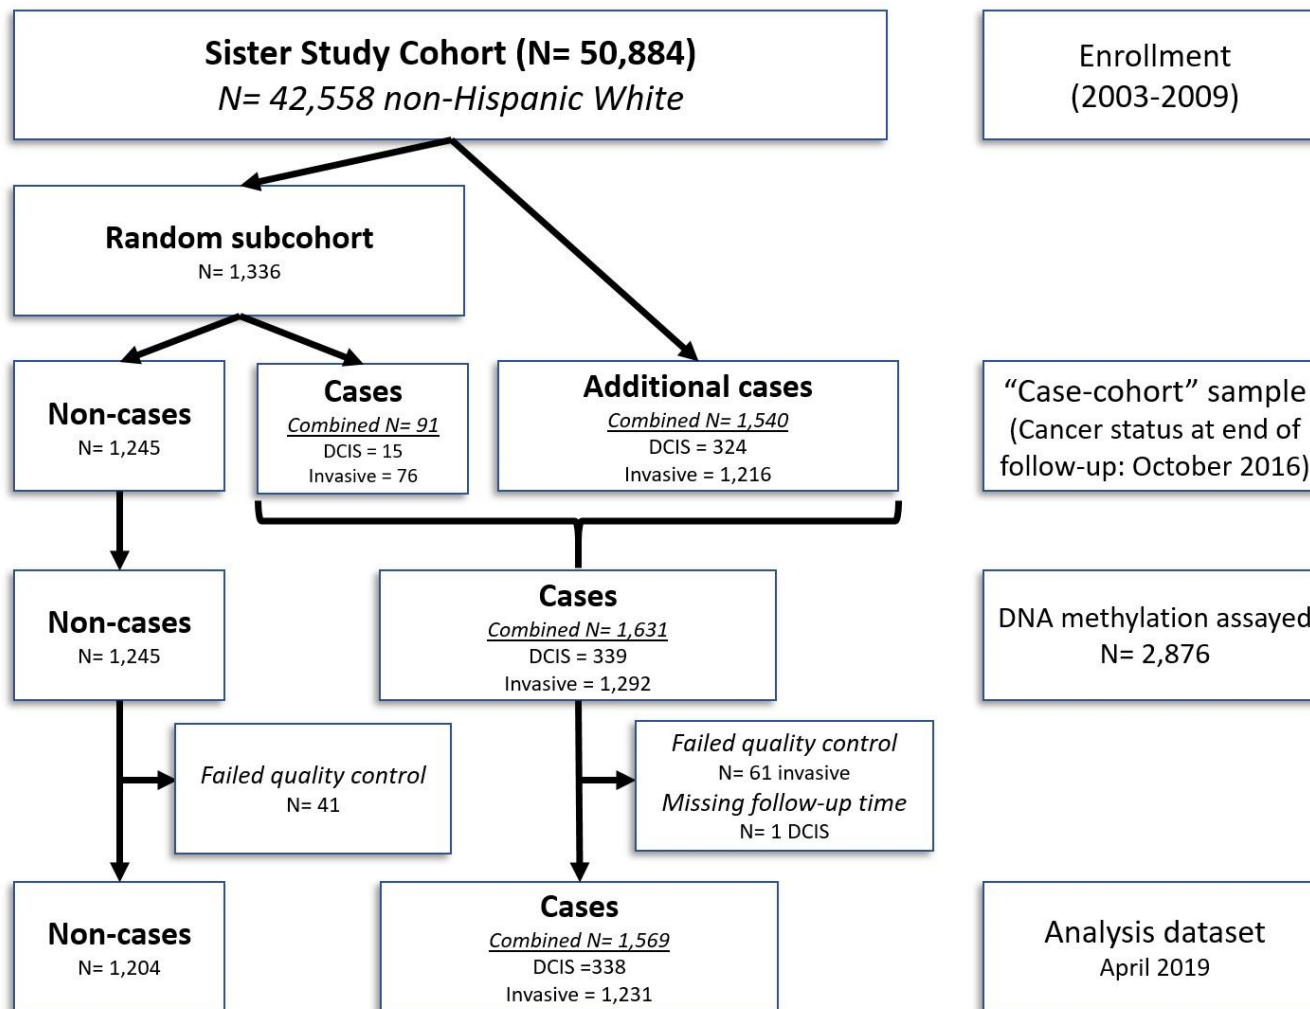

**eFigure 1.** Sampling Procedure for the Case-Cohort Subsample.

Of 42,558 non-Hispanic White women enrolled in the Sister Study, 1,336 were randomly sampled from the full cohort. Of these women, 91 developed breast cancer (15 ductal carcinoma *in situ* [DCIS] and 76 invasive) by October 2016. The random subsample was supplemented with an additional 1,540 cases (324 DCIS and 1,216 invasive) that developed cancer by October 2016. In total, 2,876 women were selected for blood genome-wide DNA methylation assessment. Of the 2,876 assays, 102 failed quality control: 91 samples that had average bisulfite intensity < 4000 or had more than 5% of probes with low-quality methylation values (detection  $p > 0.000001$ , number of beads < 3, or values outside of 3IQR); 4 samples that were outliers for their methylation beta value distributions; 1 sample with missing phenotype data; and 6 women whose date of diagnosis preceded blood draw. After quality control, 1,204 non-cases and 1,569 cases remained for analysis (conducted in April 2019).

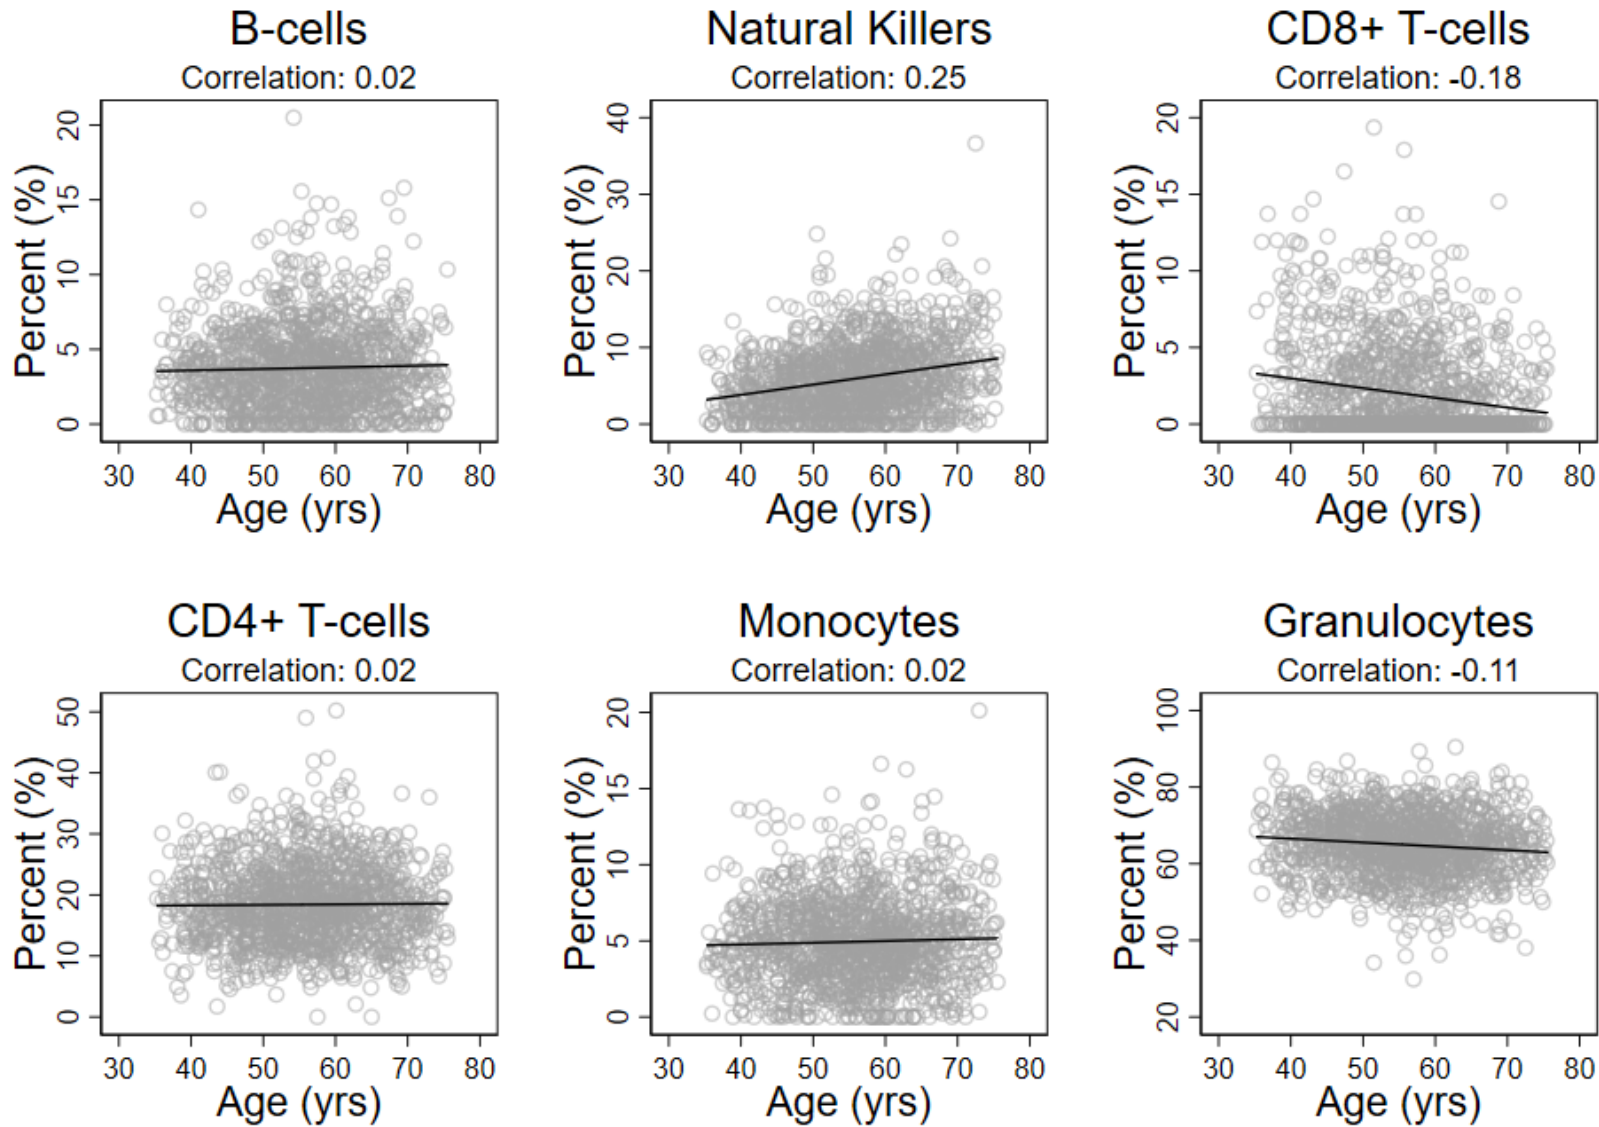

**eFigure 2.** Leukocyte Proportions Correlations With Age

Scatter plots and Spearman correlations for the six leukocyte subtypes and age at blood draw among women in the random subcohort (n= 1,295).

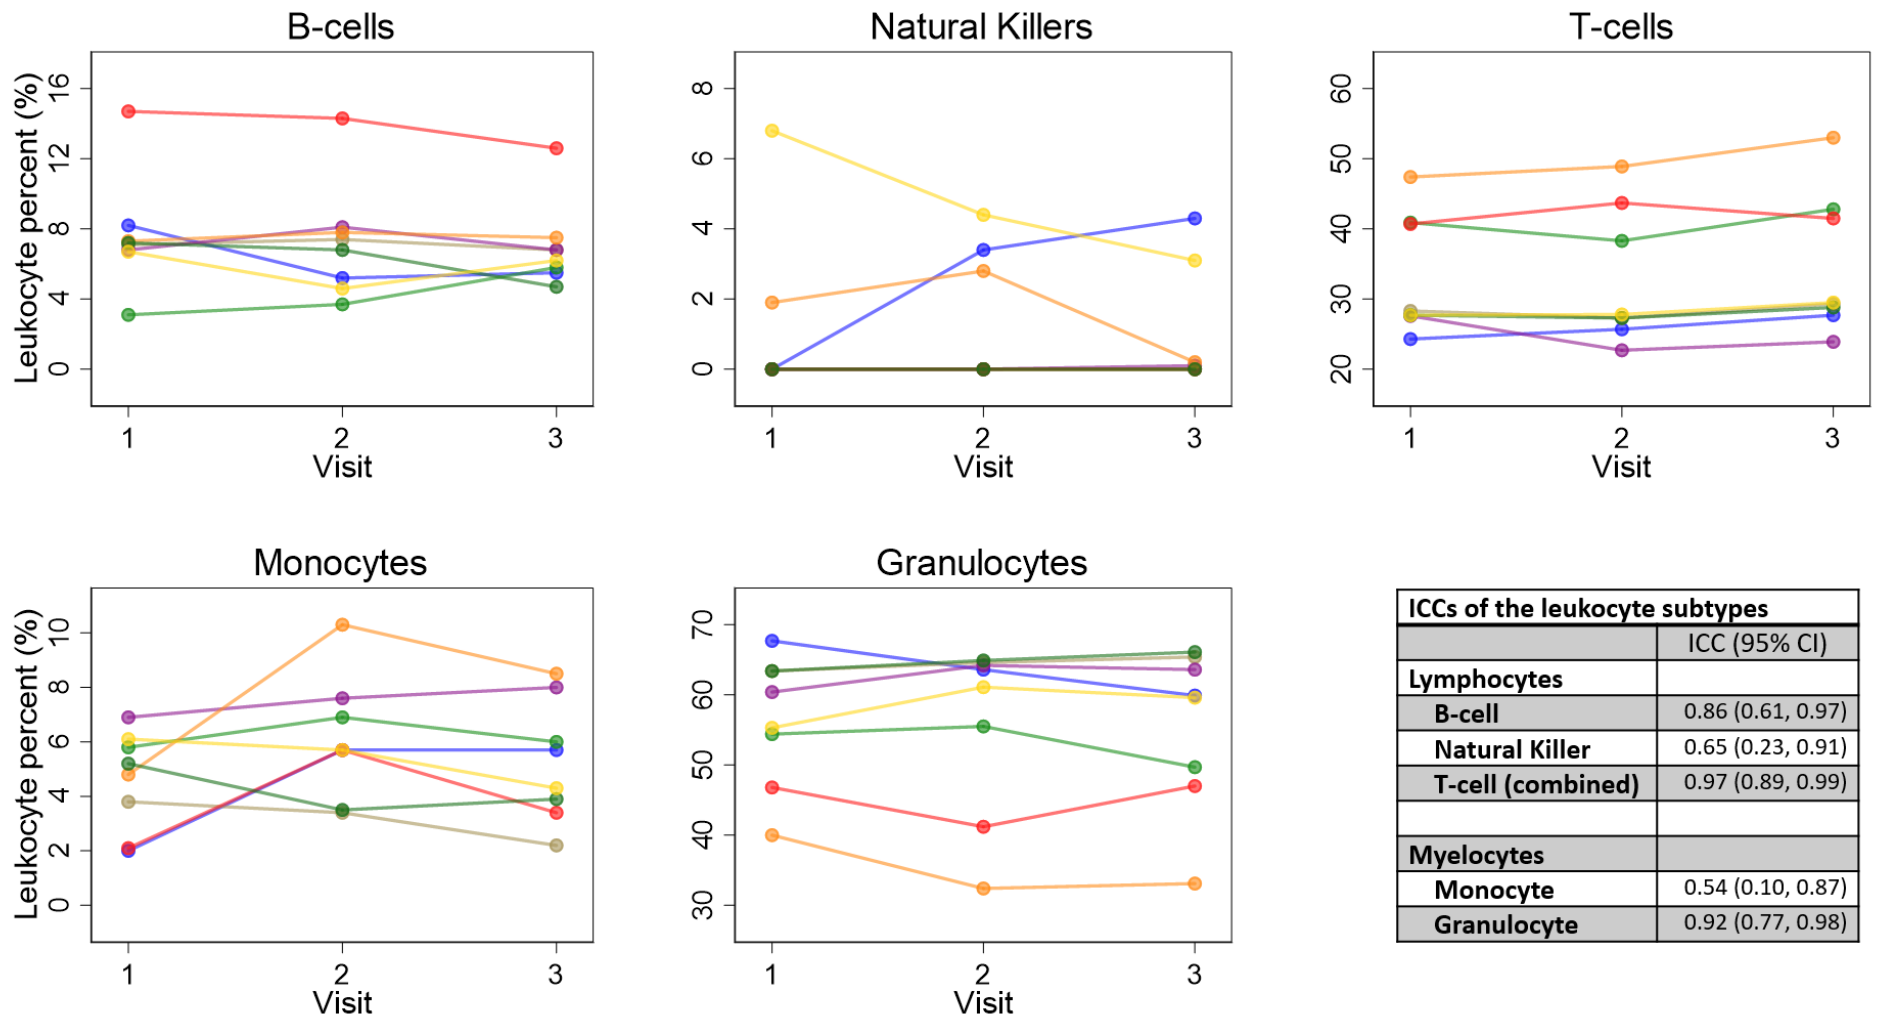

**eFigure 3.** Leukocyte Proportion Estimates Over Time

Leukocyte subtypes estimated among an independent sample of cancer-free women (n= 8) with three blood draws over a one-year period, approximately five months apart. Each line color represents an individual (consistent across cell types). Genome-wide DNA methylation was assessed using an older methylation array (Infinium HumanMethylaiton27 BeadChip) and CD4+ and CD8+ T-cells were combined.

| eTable 1. Cox Proportional Hazard Ratios for Leukocyte Subtypes (Comparing Above vs Below the Median Proportion) and Breast Cancer, by Menopause Status at Blood Draw                                                                                                                                                      |                   |         |  |                   |         |               |
|----------------------------------------------------------------------------------------------------------------------------------------------------------------------------------------------------------------------------------------------------------------------------------------------------------------------------|-------------------|---------|--|-------------------|---------|---------------|
|                                                                                                                                                                                                                                                                                                                            | Premenopausal     |         |  | Postmenopausal    |         |               |
|                                                                                                                                                                                                                                                                                                                            | HR (95% CI)       | P-value |  | HR (95% CI)       | P-value | <i>P</i> -het |
| Events/subjects                                                                                                                                                                                                                                                                                                            | 418/826           |         |  | 1,151/1,946       |         |               |
| <i>Lymphocytes</i>                                                                                                                                                                                                                                                                                                         |                   |         |  |                   |         |               |
| B-cells                                                                                                                                                                                                                                                                                                                    | 1.38 (1.05, 1.82) | 0.02    |  | 1.09 (0.91, 1.30) | 0.36    | 0.15          |
| Natural Killer                                                                                                                                                                                                                                                                                                             | 1.21 (0.92, 1.60) | 0.18    |  | 0.97 (0.81, 1.16) | 0.70    | 0.24          |
| CD8+ T-cells                                                                                                                                                                                                                                                                                                               | 1.09 (0.83, 1.44) | 0.53    |  | 1.07 (0.89, 1.28) | 0.47    | 0.87          |
| CD4+ T-cells                                                                                                                                                                                                                                                                                                               | 1.06 (0.81, 1.40) | 0.66    |  | 1.09 (0.91, 1.30) | 0.35    | 0.90          |
| <i>Myelocytes</i>                                                                                                                                                                                                                                                                                                          |                   |         |  |                   |         |               |
| Monocytes                                                                                                                                                                                                                                                                                                                  | 0.75 (0.57, 0.99) | 0.05    |  | 0.96 (0.81, 1.15) | 0.69    | 0.13          |
| Granulocytes                                                                                                                                                                                                                                                                                                               | 0.83 (0.63, 1.10) | 0.19    |  | 0.94 (0.78, 1.12) | 0.49    | 0.52          |
| <i>Ratio measures</i>                                                                                                                                                                                                                                                                                                      |                   |         |  |                   |         |               |
| mdNLR                                                                                                                                                                                                                                                                                                                      | 0.80 (0.60, 1.06) | 0.12    |  | 0.96 (0.80, 1.15) | 0.64    | 0.32          |
| <p>*Age treated as the time-scale in the Cox regression models<br/> <i>P</i>-heterogeneity tested using an interaction term between menopause status at blood draw and the leukocyte subtype.<br/> Abbreviations: hazard ratio, HR; confidence interval, CI; methylation-derived neutrophil to lymphocyte ratio, mdNLR</p> |                   |         |  |                   |         |               |

| eTable 2. Cox Proportional Hazard Ratios for Leukocyte Subtypes (Comparing Above vs Below the Median Proportion) and Invasive Breast Cancer and DCIS Risk, Overall and Stratified by Menopausal Status at Blood Draw |                   |         |                   |         |                   |         |
|----------------------------------------------------------------------------------------------------------------------------------------------------------------------------------------------------------------------|-------------------|---------|-------------------|---------|-------------------|---------|
|                                                                                                                                                                                                                      | Full sample       |         | Premenopausal     |         | Postmenopausal    |         |
|                                                                                                                                                                                                                      | HR (95% CI)       | P-value | HR (95% CI)       | P-value | HR (95% CI)       | P-value |
| <b>Invasive breast cancer</b>                                                                                                                                                                                        |                   |         |                   |         |                   |         |
| Events/subjects                                                                                                                                                                                                      | 1,231/2,449       |         | 326/737           |         | 905/1,711         |         |
| <i>Lymphocytes</i>                                                                                                                                                                                                   |                   |         |                   |         |                   |         |
| B-cells                                                                                                                                                                                                              | 1.14 (0.97, 1.34) | 0.11    | 1.36 (1.01, 1.83) | 0.04    | 1.06 (0.88, 1.28) | 0.56    |
| Natural Killer                                                                                                                                                                                                       | 1.04 (0.88, 1.22) | 0.67    | 1.15 (0.85, 1.55) | 0.36    | 0.99 (0.82, 1.20) | 0.91    |
| CD8+ T-cells                                                                                                                                                                                                         | 1.06 (0.90, 1.25) | 0.47    | 1.08 (0.80, 1.45) | 0.62    | 1.06 (0.88, 1.29) | 0.53    |
| CD4+ T-cells                                                                                                                                                                                                         | 1.12 (0.95, 1.31) | 0.17    | 1.13 (0.85, 1.52) | 0.40    | 1.10 (0.91, 1.33) | 0.31    |
| <i>Myelocytes</i>                                                                                                                                                                                                    |                   |         |                   |         |                   |         |
| Monocytes                                                                                                                                                                                                            | 0.88 (0.75, 1.04) | 0.13    | 0.69 (0.51, 0.92) | 0.01    | 0.97 (0.81, 1.18) | 0.78    |
| Granulocytes                                                                                                                                                                                                         | 0.94 (0.80, 1.10) | 0.44    | 0.83 (0.62, 1.12) | 0.23    | 0.98 (0.81, 1.19) | 0.87    |
| <i>Ratio measures</i>                                                                                                                                                                                                |                   |         |                   |         |                   |         |
| mdNLR                                                                                                                                                                                                                | 0.93 (0.79, 1.09) | 0.34    | 0.80 (0.59, 1.08) | 0.14    | 0.98 (0.81, 1.18) | 0.83    |
| <b>Ductal carcinoma <i>in situ</i></b>                                                                                                                                                                               |                   |         |                   |         |                   |         |
| Events/subjects                                                                                                                                                                                                      | 337/1,617         |         | 92/516            |         | 245/1,100         |         |
| <i>Lymphocytes</i>                                                                                                                                                                                                   |                   |         |                   |         |                   |         |
| B-cells                                                                                                                                                                                                              | 1.29 (1.01, 1.64) | 0.04    | 1.47 (0.93, 2.34) | 0.10    | 1.22 (0.91, 1.63) | 0.18    |
| Natural Killer                                                                                                                                                                                                       | 1.01 (0.79, 1.29) | 0.96    | 1.46 (0.92, 2.31) | 0.11    | 0.87 (0.65, 1.17) | 0.36    |
| CD8+ T-cells                                                                                                                                                                                                         | 1.11 (0.87, 1.41) | 0.40    | 1.15 (0.72, 1.81) | 0.56    | 1.10 (0.83, 1.46) | 0.51    |
| CD4+ T-cells                                                                                                                                                                                                         | 0.99 (0.77, 1.26) | 0.91    | 0.84 (0.53, 1.34) | 0.47    | 1.03 (0.77, 1.37) | 0.84    |
| <i>Myelocytes</i>                                                                                                                                                                                                    |                   |         |                   |         |                   |         |
| Monocytes                                                                                                                                                                                                            | 0.95 (0.75, 1.22) | 0.71    | 1.04 (0.66, 1.65) | 0.86    | 0.93 (0.70, 1.25) | 0.64    |
| Granulocytes                                                                                                                                                                                                         | 0.80 (0.63, 1.02) | 0.08    | 0.83 (0.52, 1.31) | 0.41    | 0.79 (0.59, 1.06) | 0.12    |
| <i>Ratio measures</i>                                                                                                                                                                                                |                   |         |                   |         |                   |         |
| mdNLR                                                                                                                                                                                                                | 0.87 (0.68, 1.10) | 0.24    | 0.81 (0.51, 1.28) | 0.37    | 0.89 (0.67, 1.18) | 0.42    |
| Abbreviations: hazard ratio, HR; confidence interval, CI; methylation-derived neutrophil to lymphocyte ratio, mdNLR                                                                                                  |                   |         |                   |         |                   |         |

| eTable 3. Cox Proportional Hazard Ratios for Leukocyte Subtypes (Comparing High vs Low Proportions) and Invasive Breast Cancer and DCIS Risk, Overall and Stratified by Time Since Blood Draw |                   |         |                   |         |                   |         |
|-----------------------------------------------------------------------------------------------------------------------------------------------------------------------------------------------|-------------------|---------|-------------------|---------|-------------------|---------|
|                                                                                                                                                                                               | < 1 year          |         | 1-4 years         |         | 4+ years          |         |
|                                                                                                                                                                                               | HR (95% CI)       | P-value | HR (95% CI)       | P-value | HR (95% CI)       | P-value |
| <b>Invasive breast cancer</b>                                                                                                                                                                 |                   |         |                   |         |                   |         |
| Events/subjects                                                                                                                                                                               | 116/1,404         |         | 543/1,797         |         | 572/1,744         |         |
| <i>Lymphocytes</i>                                                                                                                                                                            |                   |         |                   |         |                   |         |
| B-cells                                                                                                                                                                                       | 1.00 (0.67, 1.49) | 0.99    | 1.02 (0.83, 1.25) | 0.88    | 1.29 (1.05, 1.58) | 0.01    |
| Natural Killer                                                                                                                                                                                | 1.14 (0.76, 1.70) | 0.53    | 1.00 (0.81, 1.23) | 0.99    | 1.01 (0.82, 1.24) | 0.93    |
| CD8+ T-cells                                                                                                                                                                                  | 0.62 (0.41, 0.95) | 0.03    | 1.07 (0.87, 1.31) | 0.55    | 1.17 (0.95, 1.43) | 0.13    |
| CD4+ T-cells                                                                                                                                                                                  | 1.44 (0.95, 2.17) | 0.08    | 1.13 (0.91, 1.39) | 0.26    | 1.06 (0.87, 1.30) | 0.56    |
| <i>Myelocytes</i>                                                                                                                                                                             |                   |         |                   |         |                   |         |
| Monocytes                                                                                                                                                                                     | 0.55 (0.36, 0.84) | 0.01    | 0.89 (0.72, 1.09) | 0.25    | 0.94 (0.77, 1.15) | 0.55    |
| Granulocytes                                                                                                                                                                                  | 1.18 (0.79, 1.77) | 0.42    | 0.97 (0.79, 1.19) | 0.77    | 0.90 (0.74, 1.10) | 0.32    |
| <i>Ratio measures</i>                                                                                                                                                                         |                   |         |                   |         |                   |         |
| mdNLR                                                                                                                                                                                         | 1.05 (0.70, 1.57) | 0.82    | 0.96 (0.78, 1.18) | 0.70    | 0.91 (0.74, 1.11) | 0.35    |
| <b>Ductal carcinoma <i>in situ</i></b>                                                                                                                                                        |                   |         |                   |         |                   |         |
| Events/subjects                                                                                                                                                                               | 35/1,325          |         | 155/1,431         |         | 147/1,355         |         |
| <i>Lymphocytes</i>                                                                                                                                                                            |                   |         |                   |         |                   |         |
| B-cells                                                                                                                                                                                       | 0.89 (0.45, 1.75) | 0.73    | 1.02 (0.73, 1.42) | 0.93    | 1.83 (1.28, 2.62) | < 0.01  |
| Natural Killer                                                                                                                                                                                | 1.14 (0.56, 2.33) | 0.71    | 0.89 (0.63, 1.26) | 0.52    | 1.04 (0.73, 1.48) | 0.83    |
| CD8+ T-cells                                                                                                                                                                                  | 0.72 (0.35, 1.47) | 0.36    | 1.04 (0.74, 1.46) | 0.81    | 1.35 (0.96, 1.90) | 0.09    |
| CD4+ T-cells                                                                                                                                                                                  | 1.16 (0.56, 2.40) | 0.68    | 0.86 (0.61, 1.21) | 0.39    | 1.11 (0.79, 1.57) | 0.54    |
| <i>Myelocytes</i>                                                                                                                                                                             |                   |         |                   |         |                   |         |
| Monocytes                                                                                                                                                                                     | 0.89 (0.43, 1.83) | 0.75    | 0.83 (0.59, 1.16) | 0.28    | 1.11 (0.78, 1.58) | 0.55    |
| Granulocytes                                                                                                                                                                                  | 0.98 (0.49, 1.96) | 0.96    | 1.10 (0.78, 1.54) | 0.60    | 0.56 (0.39, 0.81) | < 0.01  |
| <i>Ratio measures</i>                                                                                                                                                                         |                   |         |                   |         |                   |         |
| mdNLR                                                                                                                                                                                         | 1.18 (0.57, 2.42) | 0.65    | 1.08 (0.76, 1.52) | 0.68    | 0.66 (0.47, 0.94) | 0.02    |

eTable 4. Mutually Adjusted Cox Proportional Hazard Ratios for Leukocyte Subtypes (Comparing Above vs Below the Median Proportion) and Breast Cancer Risk, by Time Since Blood Draw

|                                                                                                                                 | < 1 year          |         | 1-4 years         |         | 4+ years          |         |
|---------------------------------------------------------------------------------------------------------------------------------|-------------------|---------|-------------------|---------|-------------------|---------|
|                                                                                                                                 | HR (95% CI)       | P-value | HR (95% CI)       | P-value | HR (95% CI)       | P-value |
| Events/subjects                                                                                                                 | 151/1,435         |         | 699/1,949         |         | 719/1,885         |         |
| <i>Lymphocytes</i>                                                                                                              |                   |         |                   |         |                   |         |
| B-cells                                                                                                                         | 0.99 (0.68, 1.43) | 0.94    | 1.00 (0.82, 1.21) | 0.99    | 1.34 (1.10, 1.62) | < 0.01  |
| Natural Killer                                                                                                                  | <i>Excluded</i>   |         | <i>Excluded</i>   |         | <i>Excluded</i>   |         |
| CD8+ T-cells                                                                                                                    | 0.63 (0.42, 0.94) | 0.02    | 1.05 (0.86, 1.29) | 0.64    | 1.13 (0.92, 1.39) | 0.23    |
| CD4+ T-cells                                                                                                                    | 1.38 (0.91, 2.10) | 0.13    | 1.06 (0.85, 1.33) | 0.61    | 1.00 (0.80, 1.25) | 0.99    |
| <i>Myelocytes</i>                                                                                                               |                   |         |                   |         |                   |         |
| Monocytes                                                                                                                       | 0.60 (0.41, 0.88) | 0.01    | 0.88 (0.73, 1.07) | 0.21    | 1.04 (0.86, 1.26) | 0.70    |
| Granulocytes                                                                                                                    | 1.20 (0.79, 1.84) | 0.39    | 1.05 (0.83, 1.33) | 0.68    | 0.91 (0.72, 1.15) | 0.44    |
| As the leukocyte proportions represent compositional data, natural killer proportions were excluded to avoid model overfitting. |                   |         |                   |         |                   |         |
